# Supplementary material for: Ghrelin Ameliorates Traumatic Brain Injury by Down-Regulating bFGF and FGF-BP
Source: Front Neurosci. 2018 Jul 5;12:445. doi: 10.3389/fnins.2018.00445 (PMC6041414; doi:10.3389/fnins.2018.00445)
Supplement: DATA SHEET S1 — Antibody array data of differential proteins. [file Data_Sheet_1.XLS]

## Sheet: Differential proteins
			Sham group															Sham+Ghrelin group															TBI group															TBI+Ghrelin group
Array	uniprotID	proteinID	S1	S2	S3	S4	S5	S6	S7	S8	S9	S10	S11	S12	S13	S14	S15	S+G1	S+G2	S+G3	S+G4	S+G5	S+G6	S+G7	S+G8	S+G9	S+G10	S+G11	S+G12	S+G13	S+G14	S+G15	T1	T2	T3	T4	T5	T6	T7	T8	T9	T10	T11	T12	T13	T14	T15	T+G1	T+G2
CYT4-21	P26897	IL-2 Ra	1493.11	986.125	1298.93	1570.76	1659.25	966.403	1827.84	1661.83	1342.83	1579.24	966.756	973.848	981.318	749.461	936.752	1444.11	987.126	1279.93	1371.76	1560.25	967.403	1828.84	1662.83	1343.83	1580.24	967.756	974.849	982.318	750.461	737.753	2177.3	2046.63	1990.66	1945.07	1986.77	1841.16	2465.62	2317.64	2854.27	2202.64	3249.86	2084.97	2992.12	2624.55	2552.78	2413.92	1912.26
CYT4-6	D4AAL6	CTACK	4480.54	3354.97	3558.54	3926.37	4377.53	3257.87	4119	4986.84	3569.22	3447.57	2299.27	3113.2	3510.29	3873.13	2318.17	4181.54	3055.97	2559.54	3927.37	4378.53	3258.87	4020	3987.84	3170.22	3448.57	2300.27	2114.2	3011.29	3574.13	2319.17	5108.09	5303.27	5094	4899.91	5840.85	5348.13	5384.5	6305.53	5768.54	5548.75	6614.29	6056.33	6550.49	6800.78	6532.42	5482.36	4841.74
CYT4-29	O35276	Neuropilin-2	4254.62	3389.38	4095.74	4291.69	4804.69	3821.59	4520.86	4335.4	4308.03	4014.86	3333.11	3347.18	3140.21	4233.49	4739.54	4255.62	3290.38	4096.74	4692.69	4805.69	3622.59	4221.86	3336.4	3309.03	3015.86	2834.11	3148.18	3141.21	4234.49	3740.54	4928.73	4862.91	5491.39	5342.11	5379.78	4834.88	5581.39	6506.86	6218.56	6049.51	6392.17	6475.12	6320.48	6736.07	7042.02	5635.66	6438.33
CYT4-20	P25086	IL-1 ra	965.453	370.339	664.472	1337.22	1397.68	372.932	1470.94	1074.55	1066.47	1344.44	364.191	365.728	655.462	1319.08	1378.73	966.453	371.339	685.473	1338.22	1298.68	373.932	1471.94	1075.55	1067.47	1345.44	365.192	366.728	656.463	920.084	879.73	1950.44	1504.21	1645.24	1750.21	1687.95	1580.82	2208.71	1703.4	1863.11	1981.97	1911.47	1990.15	2501.19	1928.97	2109.82	1489.23	1434.19
GF-3	P25427	bNGF	931.643	756.667	679.516	851.808	1054.02	771.533	1036.99	1096.92	1081.56	856.408	764.106	747.246	670.302	840.257	1039.73	932.643	757.667	680.517	852.808	1055.03	772.534	937.989	1097.92	1082.56	857.408	765.107	748.247	671.303	841.258	1040.73	1168.14	1046.49	1027.31	1170.3	961.707	1026.95	1322.83	1585.06	1763.35	1525.27	1089.06	1162.94	1497.99	1741.99	1317.4	889.393	1026.58
CYT4-11	Q9QY10	FGF-BP	4939.23	6986.86	4822.78	7270.71	8243.2	6847.12	7997.78	5497.36	4837.24	4309.97	4870.88	6899.87	4157.38	7172.12	6131.42	4540.23	4987.86	4823.78	7271.71	7244.2	6348.12	7598.78	5098.36	4838.24	4310.97	4171.88	4900.87	4158.38	7173.12	6132.42	8846.58	8563.81	7409.59	7488.32	8218.69	8756.5	10018	9697.83	8390.76	8479.92	9307.01	9916.03	11344.6	10982	9501.87	7770.49	7287.47
GF-6	A0A0G2K6K8	FLT-3 Ligand	158.643	199.182	126.07	223.981	260.858	215.198	286.379	276.569	326.448	225.19	195.876	196.702	124.36	220.944	257.321	159.643	200.183	127.07	224.981	261.859	316.199	287.379	277.57	327.449	226.191	196.876	197.703	135.361	221.944	258.322	278.307	209.74	257.023	253.281	217.358	277.405	365.16	237.514	391.058	486.821	446.14	314.138	556.894	668.965	629.6	209.436	244.741
CYT4-14	P08699	Galectin-3	3016.06	2270.84	2459.83	3953.88	4328.35	2325.42	4349.27	3356.87	2767.21	3575.24	2133.14	2242.57	2026.47	3900.27	4069.66	3017.06	2271.84	2460.83	3754.89	4029.35	2326.42	3350.27	3357.87	2768.21	3576.24	2134.15	2043.57	2027.47	2901.27	3070.66	6827.32	4489.65	4257.73	3881.9	4406.98	4569.91	7731.4	5084.17	4821.54	4395.94	4990.56	5175.06	8755.19	7757.41	7460.01	6711.87	3737.89
CYT4-24	Q5BJ95	IL-17F	679.077	0	515.672	1141.98	1299.02	654.869	1256.18	1755.81	617.219	1148.15	575.564	512.575	508.68	1126.5	1281.41	680.078	1.00055	516.673	1142.98	1300.02	655.869	1257.18	1956.81	618.22	1149.15	876.565	513.576	509.68	727.498	1282.41	1223.14	1283.56	799.475	1437.05	1167.14	1263.22	1785.1	1453.53	1105.34	1627.34	1721.7	1430.49	1568.52	1646.01	2025.23	1237.54	1267.56
CYT4-35	P50231	RANTES	2414.02	394.297	2272.15	2922.21	3272.87	1386.41	3614.43	2686.8	2078.96	2437.99	387.752	389.388	2241.34	2882.58	2728.49	2415.02	395.298	2273.15	2923.21	3273.88	1387.41	2615.43	2687.8	2179.97	2438.99	388.752	390.389	2242.34	2083.59	2729.5	4230.9	2671.33	2956.18	3476.47	4657.78	3409.78	4791.16	4025.07	3347.64	4236.83	5274.57	3861.31	5625.61	3425.65	3790.93	3401.94	1604.92
CYT3-9	Q00238	ICAM-1	14104.9	6739.55	6356.42	13618	15252.2	6204.75	15979.8	12698.8	5375.49	7691.57	6127.67	6155.64	6070.23	13433.4	12045.4	14105.9	6640.55	6057.42	12319	13253.2	6005.76	7980.84	9699.8	5376.49	7392.57	6128.67	6156.64	6071.23	8434.38	8046.38	19475.1	11927.5	13556.4	16133.6	17206.3	15336.6	22054	16507	15351.6	18270	19484.8	17367.5	24974.4	18295.6	17384.4	18426.9	12304
CYT4-18	P17945	HGF	5873.73	2981.31	3604.39	3755.45	4206.1	3221.69	4130.99	6837.46	3615.2	3775.73	2931.83	2744.2	3555.51	3704.53	4149.07	5874.73	2982.32	3605.39	3756.45	4207.1	3222.69	4131.99	6838.46	3616.2	3776.73	2932.83	2745.2	3556.51	3205.53	3150.07	7205.12	7142.83	5188.81	6887.25	5865.06	4056.03	8159.22	8088.68	5875.91	7799.26	6641.71	6593.13	9239.66	9159.78	6954	4961.39	12181.4
GF-4	P13109	bFGF	27569.6	9438.36	15469.6	22610.1	25323.3	19259.6	18871.1	18685	16516.1	19732.2	17081.7	19320.8	18259.9	22303.5	20979.9	17570.6	19438.4	15470.6	22611.1	22324.3	19260.6	18872.1	20686	12517.1	12733.2	19082.7	19021.8	18060.9	20304.5	18980.9	23504.3	34127.5	32357.9	31550.4	26045.6	23362.6	26616.8	38646.6	36642.7	35728.3	29494.6	36456.2	30141.3	33764.2	45494.9	13025.3	26860.2
[truncated: 36 more columns]
